# Supplementary material for: Identifying the causes and consequences of assembly gaps using a multiplatform genome assembly of a bird‐of‐paradise
Source: PubMed Central journal article supplement (PMC7757076; doi:10.1111/1755-0998.13252), 2020-10-10
Supplement: MEN-21-263-s004.pdf [file MEN-21-263-s004.pdf]

# Identifying the causes and consequences of assembly gaps using a multiplatform genome assembly of a bird-of-paradise

Valentina Peona<sup>1,2</sup>, Mozes P.K. Blom<sup>3,4</sup>, Luohao Xu<sup>5</sup>, Reto Burri<sup>6</sup>, Shawn Sullivan<sup>7</sup>, Ignas Bunikis<sup>8</sup>, Ivan Liachko<sup>7</sup>, Tri Haryoko<sup>9</sup>, Knud A. Jønsson<sup>10</sup>, Qi Zhou<sup>5,11,12</sup>, Martin Irestedt<sup>3</sup>, Alexander Suh<sup>1,2,13</sup>

## Affiliation

<sup>1</sup> Department of Ecology and Genetics – Evolutionary Biology, Uppsala University, Science for Life Laboratories, Norbyvägen 18D, SE-752 36, Uppsala, Sweden

<sup>2</sup> Department of Organismal Biology – Systematic Biology, Uppsala University, Norbyvägen 18D, SE-752 36, Uppsala, Sweden

<sup>3</sup> Department of Bioinformatics and Genetics, Swedish Museum of Natural History, SE-104 05, Stockholm, Sweden

<sup>4</sup> Museum für Naturkunde, Leibniz Institut für Evolutions- und Biodiversitätsforschung, Berlin, Germany

<sup>5</sup> Department of Neurosciences and Developmental Biology, University of Vienna, Vienna, Austria

<sup>6</sup> Department of Population Ecology, Institute of Ecology and Evolution, Friedrich-Schiller-University Jena, Dornburger Strasse 159, D-07743 Jena, Germany

<sup>7</sup> Phase Genomics, Inc. 1617 8th Ave N, Seattle, WA 98109 USA

<sup>8</sup> Uppsala Genome Center, Science for Life Laboratory, Dept. of Immunology, Genetics and Pathology, Uppsala University, SE-752 37, Uppsala, Sweden

<sup>9</sup> Museum Zoologicum Bogoriense, Research Centre for Biology, Indonesian Institute of Sciences (LIPI), Cibinong, Indonesia

<sup>10</sup> Natural History Museum of Denmark, University of Copenhagen, Universitetsparken 15, DK-2100 Copenhagen, Denmark

<sup>11</sup> MOE Laboratory of Biosystems Homeostasis & Protection, Life Sciences Institute, Zhejiang University, Hangzhou, China

<sup>12</sup> Center for Reproductive Medicine, The 2nd Affiliated Hospital, School of Medicine, Zhejiang University

<sup>13</sup> School of Biological Sciences – Organisms and the Environment, University of East Anglia, NR4 7TJ, Norwich, UK

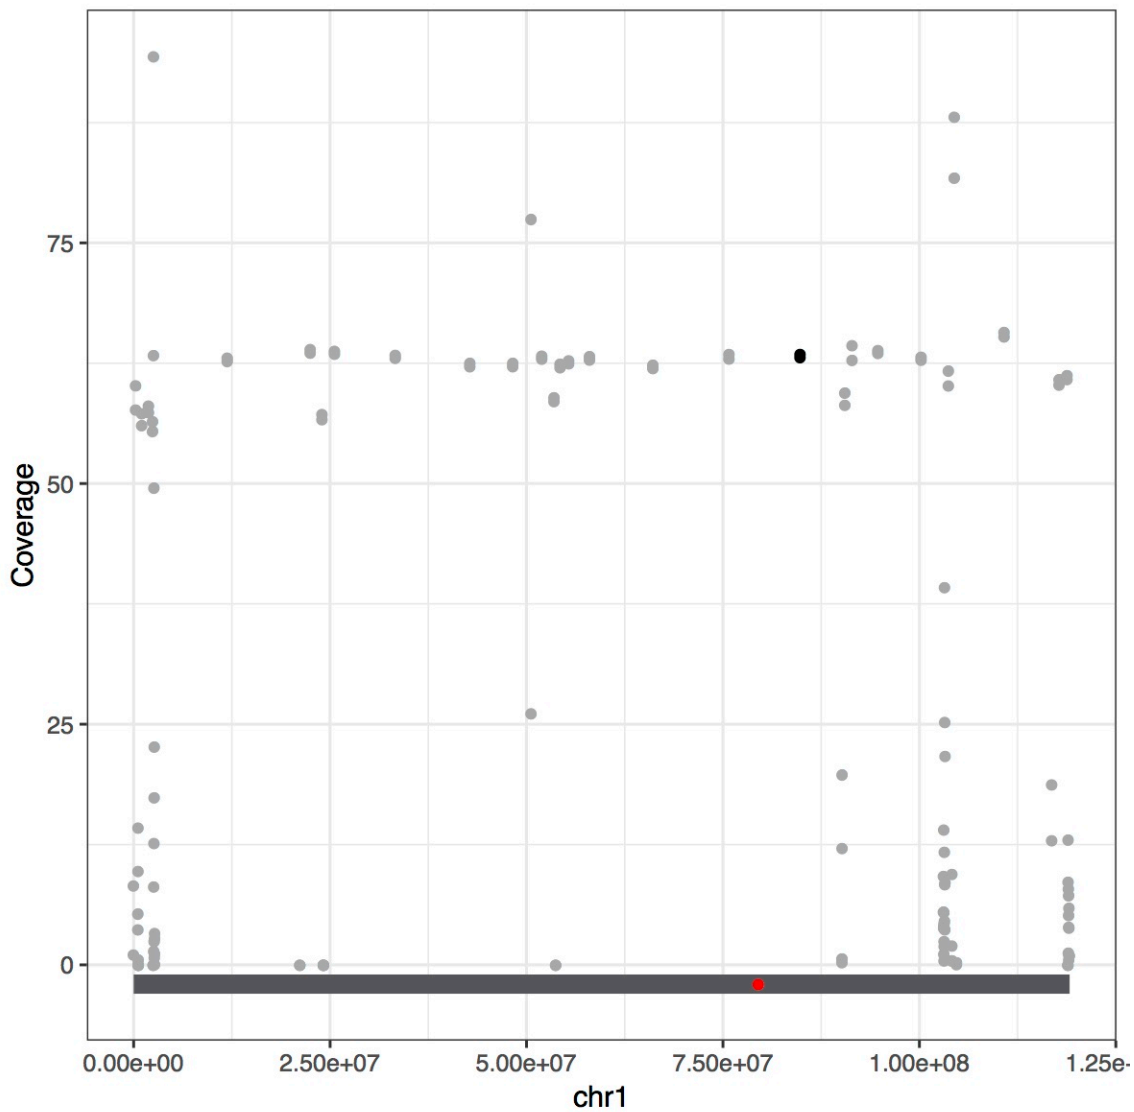

**Figure S13.** Mean coverage of the lycPyr6 chromosome models or scaffolds/containing MHC genes. Coverage calculated using PacBio reads per contig, and plotted as a dot at each contig midpoint. Black dots: contigs with identified MHC genes; grey dots: contigs without identified MHC genes; red dot: contigs with coverage >100X (placed at the bottom).

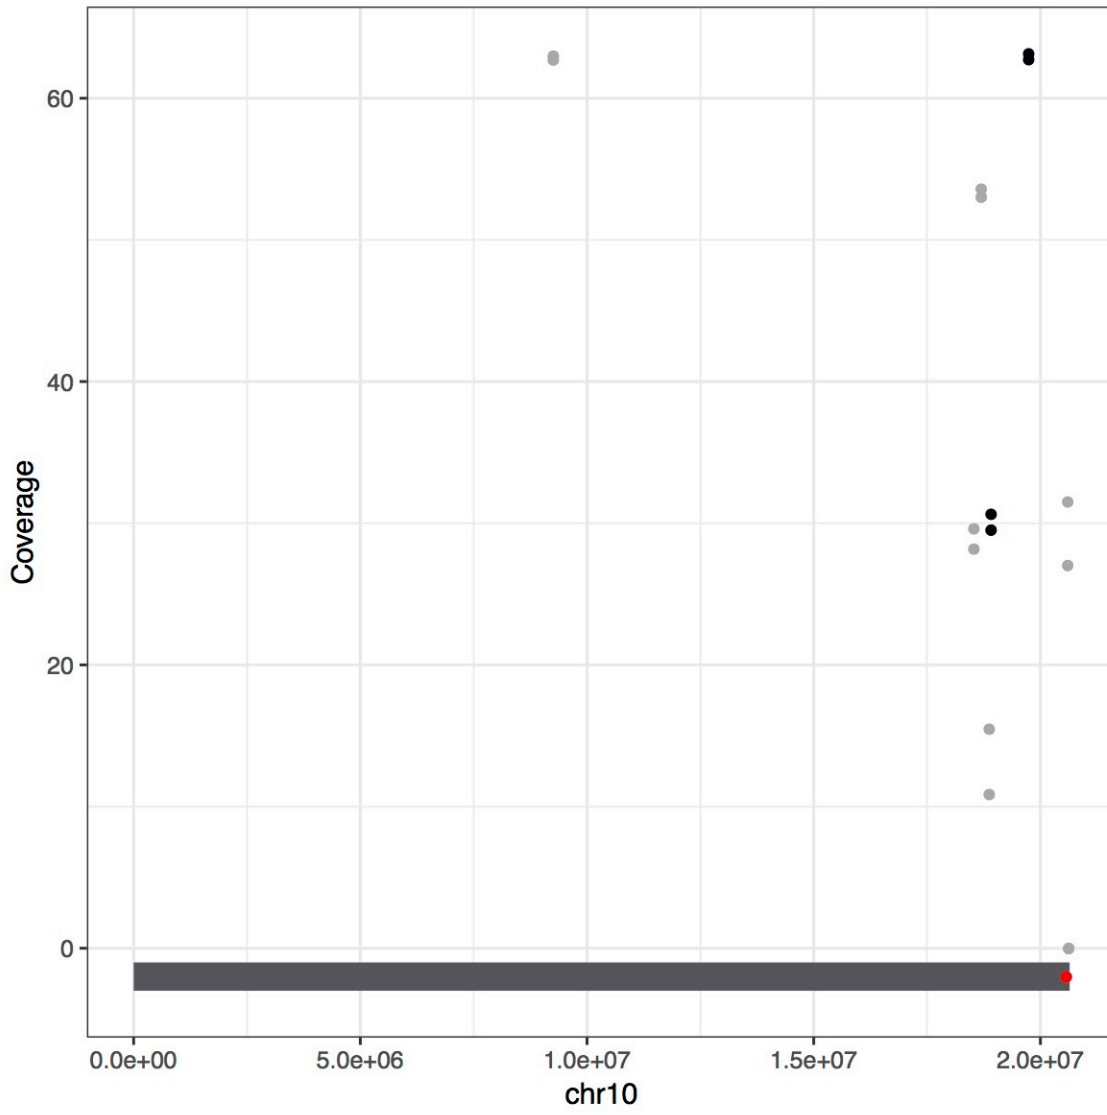

Figure S13. Continued.

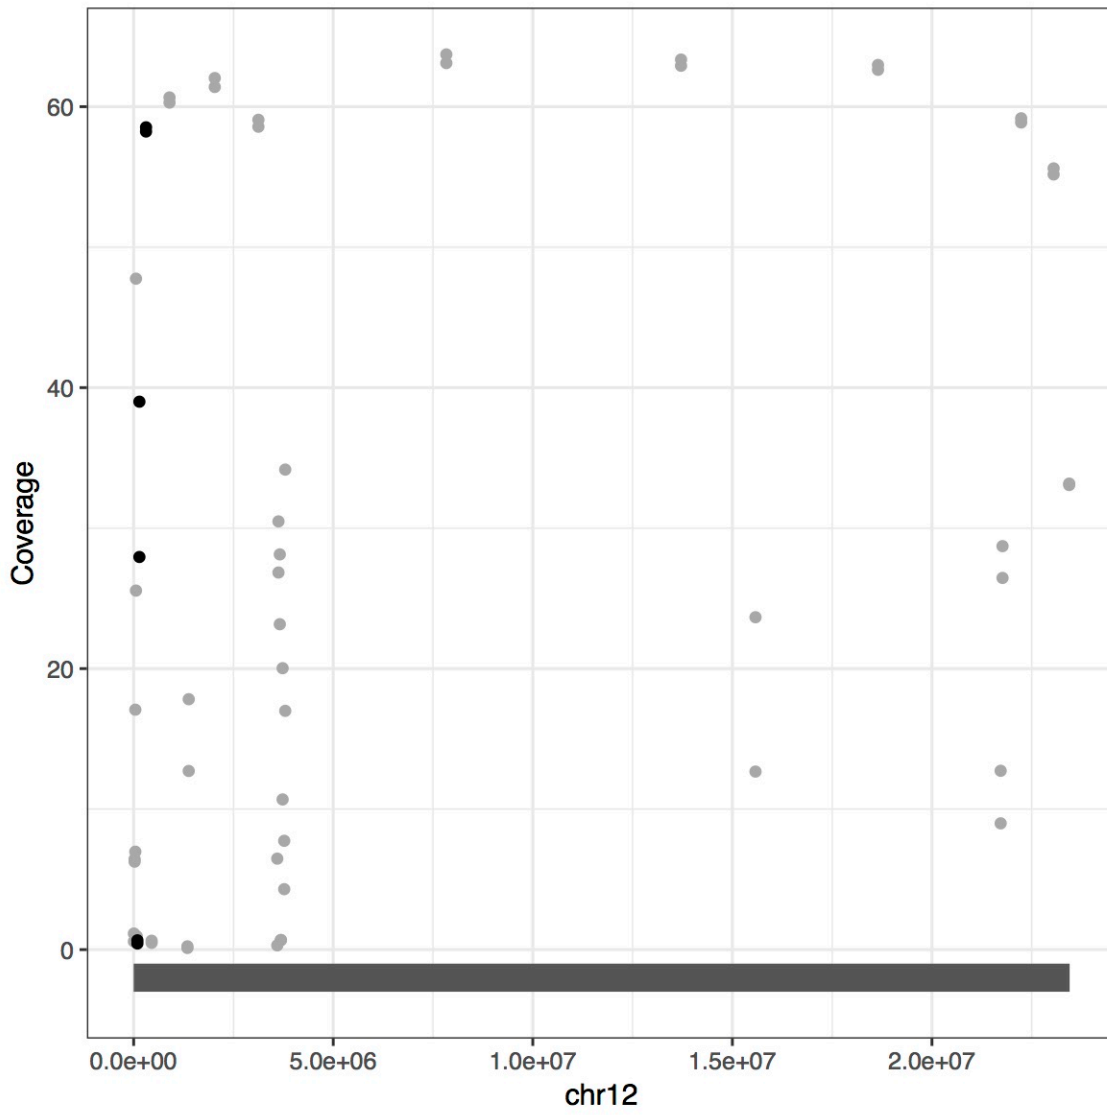

Figure S13. Continued.

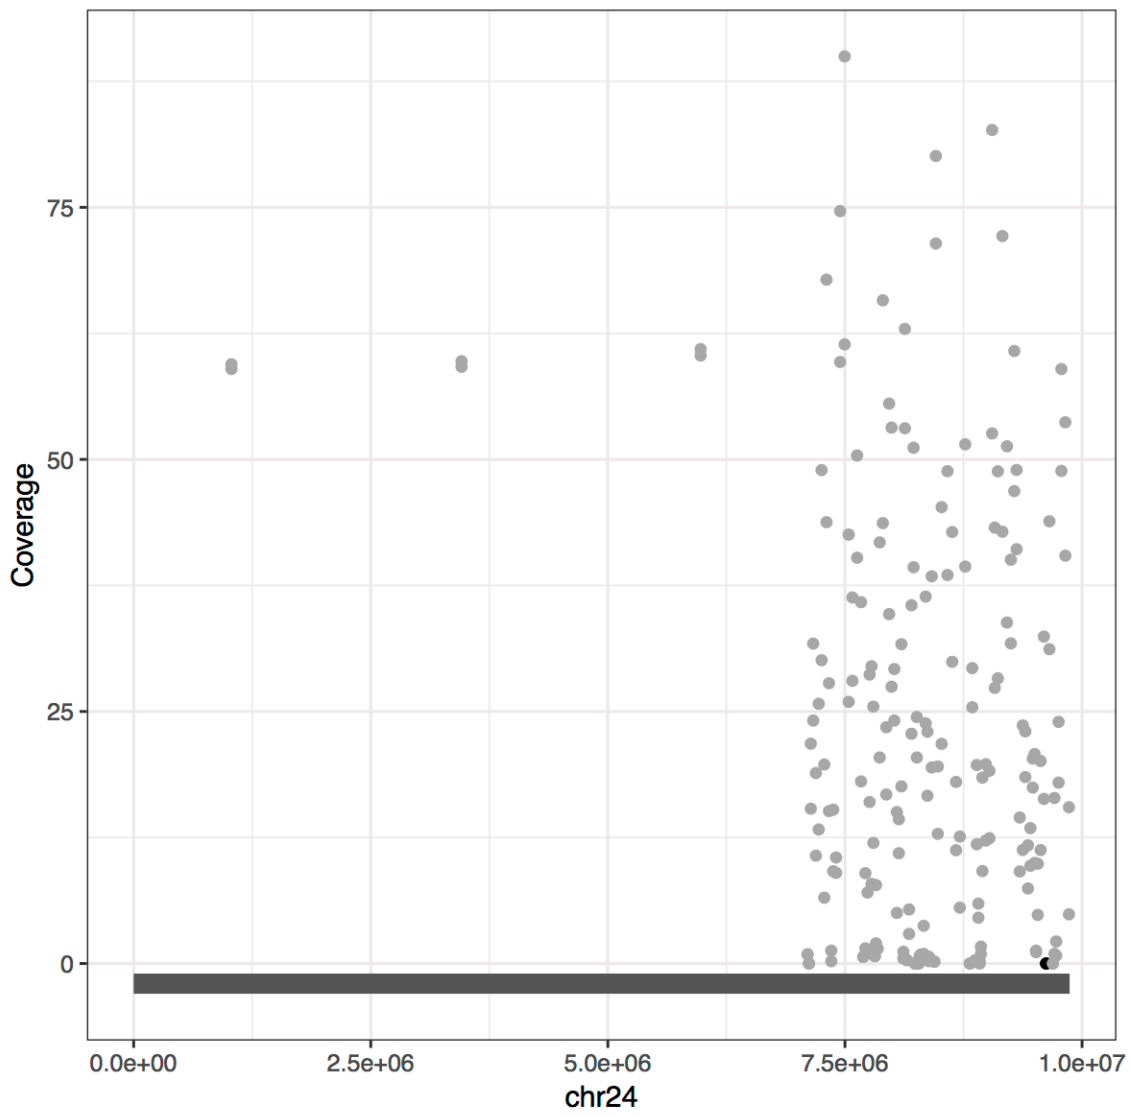

**Figure S13.** Continued.

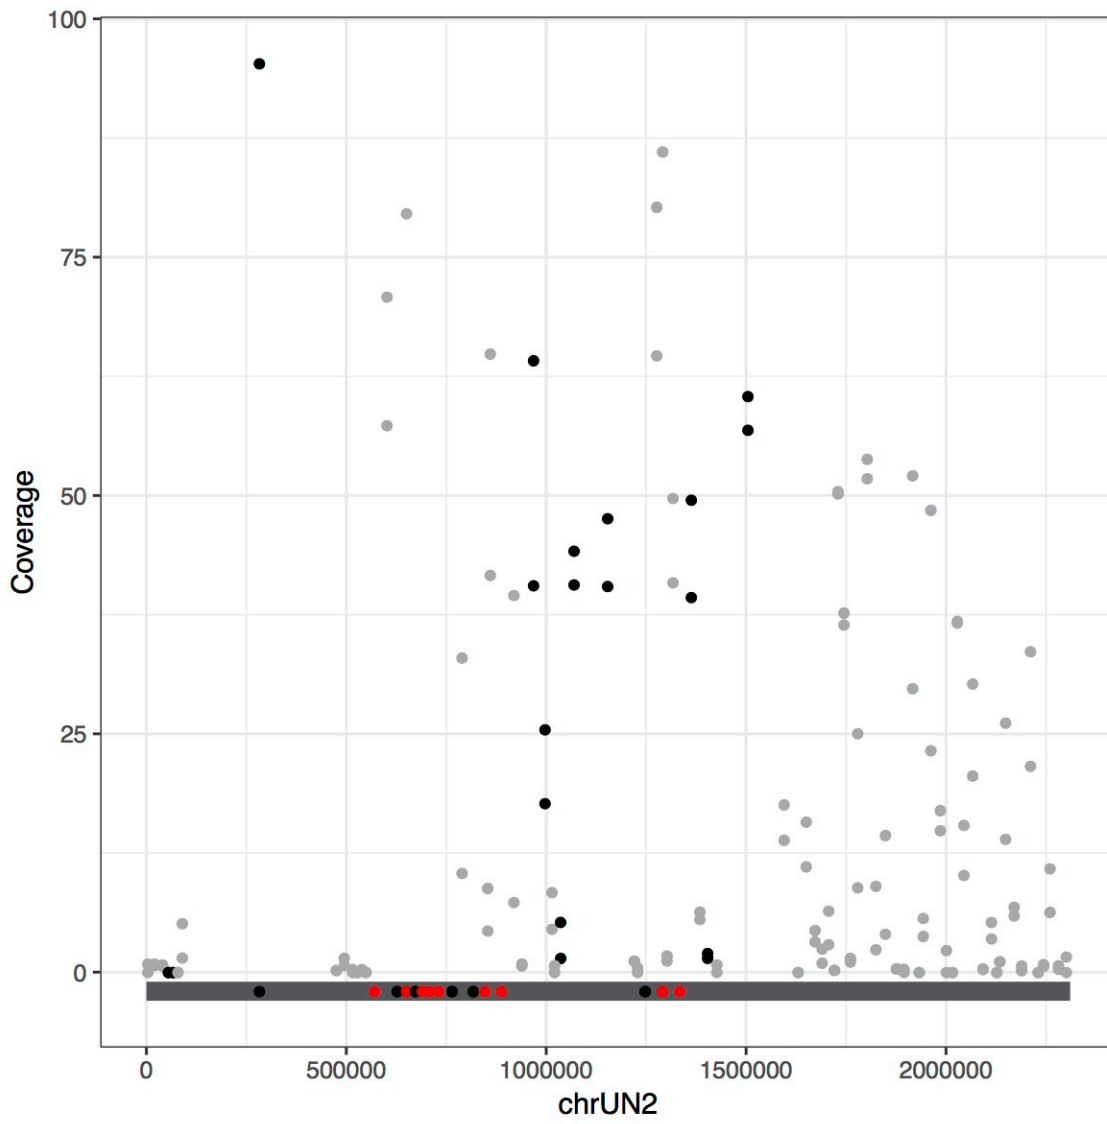

Figure S13. Continued.

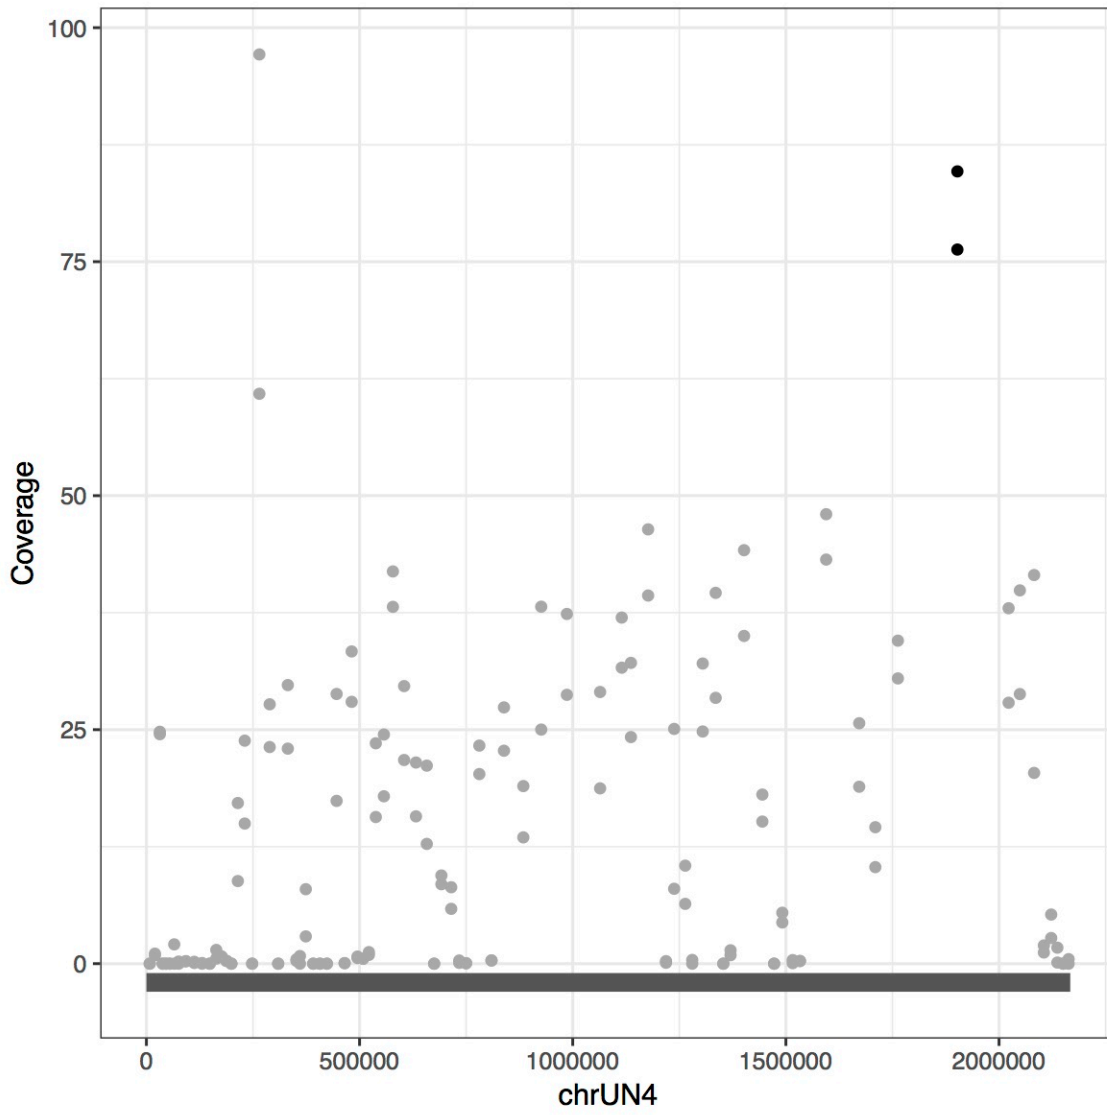

Figure S13. Continued.

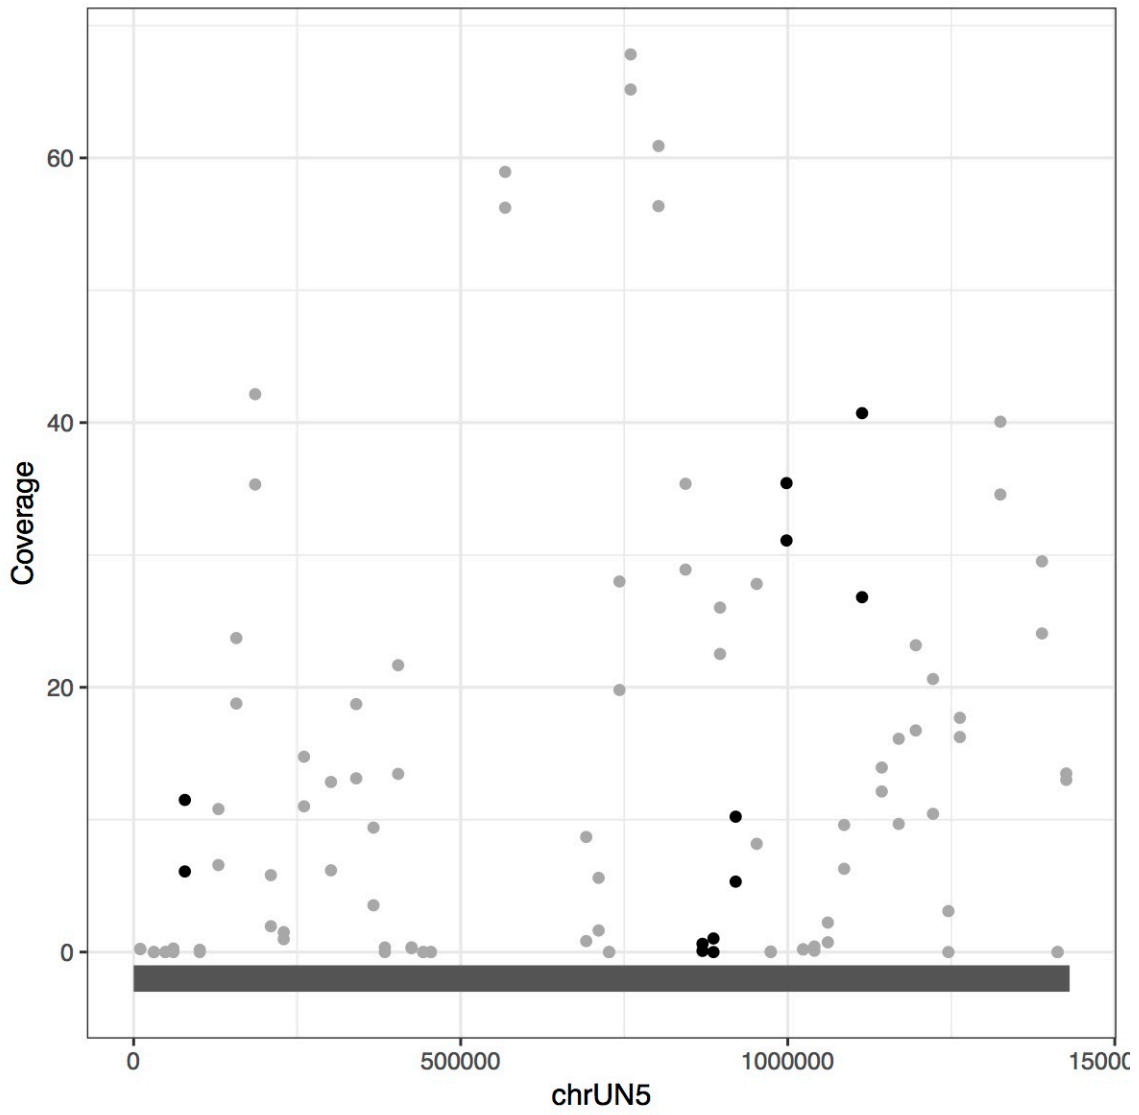

Figure S13. Continued.



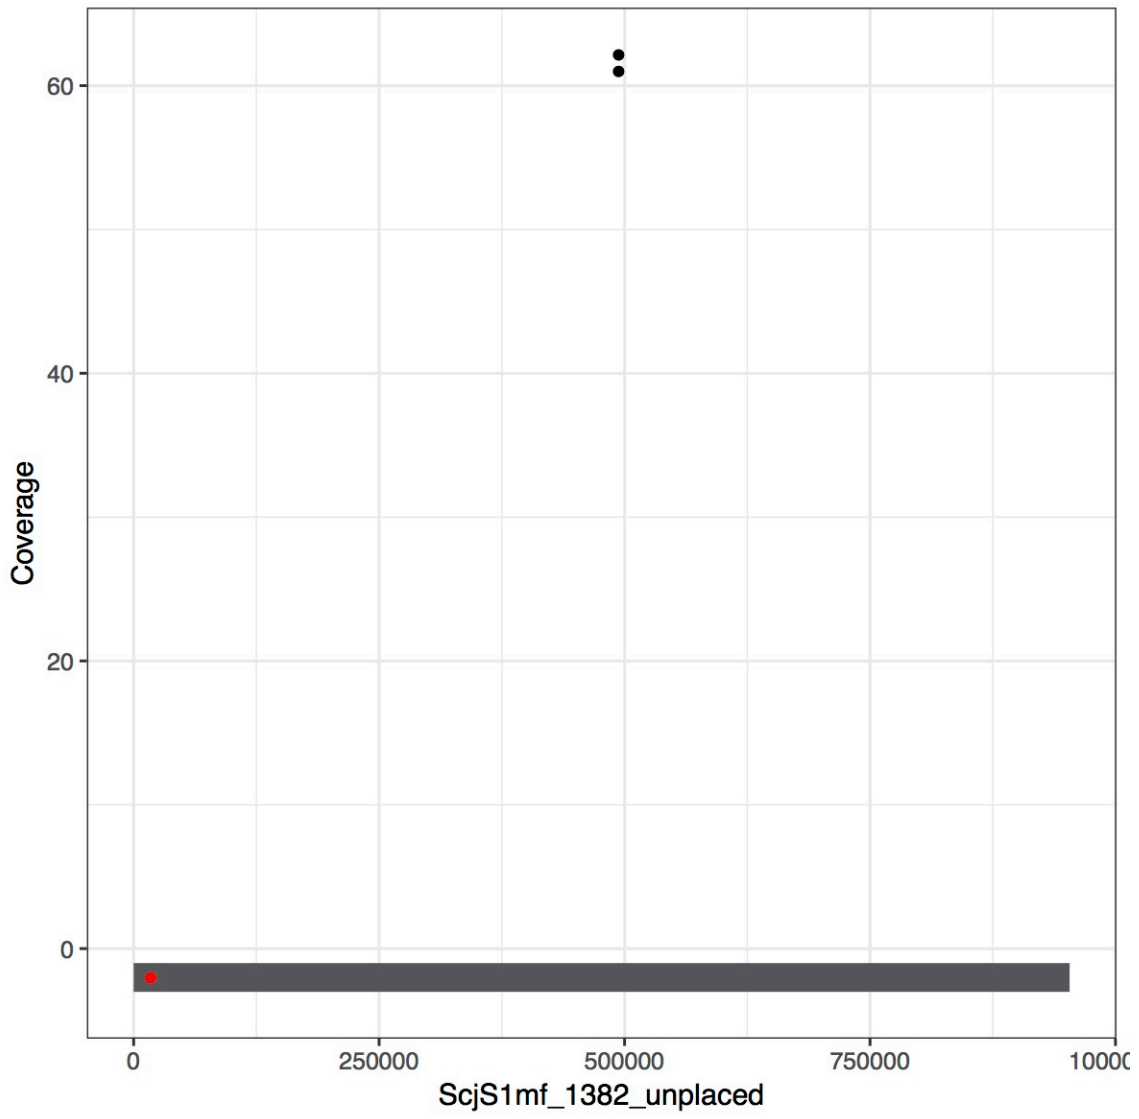

**Figure S13.** Continued.
